# Supplementary material for: CD8 T cell epitope generation toward the continually mutating SARS-CoV-2 spike protein in genetically diverse human population: Implications for disease control and prevention
Source: PubMed Central journal article supplement (PMC7728258; doi:10.1371/journal.pone.0239566), 2020-12-10
Supplement: pone.0239566.s003.pdf [file pone.0239566.s003.pdf]

**S1 Fig.** Multiple sequence alignment of 1000 S protein sequences with reference S protein of SARS-CoV-2 (QHD43416.1) showing position 601 to 720 that contains D614G mutation with high frequency

|             |     |                                                                                                                             |     |
|-------------|-----|-----------------------------------------------------------------------------------------------------------------------------|-----|
| QHD43416.1  | 601 | GTNTSNQVAVLYQDVNCTEVPVAIHADQLTPTWRVYSTGNSNVFQTRAGCLIGAETHVNSYECDIPIGAGICASYQTQTNsprrrarsvasqsiiIAYTMSLGAENSVAYSNNSIAIPTNFTI | 720 |
| QJF75467.1  | 601 | .....                                                                                                                       | 720 |
| QII57278.1  | 601 | .....                                                                                                                       | 720 |
| QJR85953.1  | 601 | .....                                                                                                                       | 720 |
| QJX45031.1  | 601 | .....                                                                                                                       | 720 |
| QJS39567.1  | 601 | .....                                                                                                                       | 720 |
| QJF77846.1  | 601 | .....                                                                                                                       | 720 |
| QJR87129.1  | 601 | .....                                                                                                                       | 720 |
| QIZ16509.1  | 601 | .....                                                                                                                       | 720 |
| QIS60546.1  | 601 | .....                                                                                                                       | 720 |
| QJD20632.1  | 601 | .....                                                                                                                       | 720 |
| QJS39579.1  | 601 | .....                                                                                                                       | 720 |
| QIC91196.1  | 601 | .....                                                                                                                       | 720 |
| QIZ16559.1  | 601 | .....                                                                                                                       | 720 |
| QKV38208.1  | 601 | .....                                                                                                                       | 720 |
| QJT73034.1  | 601 | .....                                                                                                                       | 720 |
| QIU81585.1  | 601 | .....                                                                                                                       | 720 |
| QKV39923.1  | 601 | .....                                                                                                                       | 720 |
| QJG65956.1  | 601 | .....                                                                                                                       | 720 |
| QIS30425.1  | 601 | .....                                                                                                                       | 720 |
| QKS90791.1  | 601 | .....                                                                                                                       | 720 |
| QJQ84843.1  | 601 | .....                                                                                                                       | 720 |
| QIZ297039.1 | 601 | .....                                                                                                                       | 720 |
| QKU32813.1  | 601 | .....                                                                                                                       | 720 |
| QKV41471.1  | 601 | .....                                                                                                                       | 720 |
| QIS60489.1  | 601 | .....                                                                                                                       | 720 |
| QJE38426.1  | 601 | .....                                                                                                                       | 720 |
| QLC48052.1  | 601 | .....                                                                                                                       | 720 |
| QII87830.1  | 601 | .....Y.....                                                                                                                 | 720 |
| GHU79173.2  | 601 | .....                                                                                                                       | 720 |
| QIS61422.1  | 601 | .....                                                                                                                       | 720 |
| QJS53398.1  | 601 | .....                                                                                                                       | 720 |
| QKU28894.1  | 601 | .....                                                                                                                       | 720 |
| QIO04367.1  | 601 | .....                                                                                                                       | 720 |
| QIT07011.1  | 601 | .....                                                                                                                       | 720 |
| QII57268.2  | 601 | .....                                                                                                                       | 720 |
| QIS61254.1  | 601 | .....X.....                                                                                                                 | 720 |
| QJE38822.1  | 601 | .....                                                                                                                       | 720 |
| QKG89546.1  | 601 | .....                                                                                                                       | 720 |
| QIU80913.1  | 601 | .....                                                                                                                       | 720 |
| QKK14611.1  | 601 | .....T.....                                                                                                                 | 720 |
| QKV06271.1  | 601 | .....                                                                                                                       | 720 |
| QKV06859.1  | 601 | .....                                                                                                                       | 720 |
| QIU81885.1  | 601 | .....                                                                                                                       | 720 |
| QIU81873.2  | 601 | .....V.....                                                                                                                 | 720 |
| QJW39952.1  | 601 | .....                                                                                                                       | 720 |
| QIS30165.1  | 601 | .....                                                                                                                       | 720 |
| QIS98583.1  | 601 | .....                                                                                                                       | 720 |
| QKV35819.1  | 601 | .....                                                                                                                       | 720 |
| QJS57147.1  | 601 | .....A.....                                                                                                                 | 720 |
| QJF76007.1  | 601 | .....                                                                                                                       | 720 |
| QJC19455.1  | 601 | .....L.....                                                                                                                 | 720 |
| QKU31481.1  | 601 | .....                                                                                                                       | 720 |
| QIS60906.1  | 601 | .....                                                                                                                       | 720 |
| QJR84837.1  | 601 | .....X.....                                                                                                                 | 720 |
| QKU33257.1  | 601 | .....                                                                                                                       | 720 |
| QJQ84676.1  | 601 | .....                                                                                                                       | 720 |
| QIV65033.1  | 601 | .....                                                                                                                       | 720 |
| QKU28906.1  | 601 | .....                                                                                                                       | 720 |
| QJR84993.1  | 601 | .....                                                                                                                       | 720 |
| QIS30335.1  | 601 | .....                                                                                                                       | 720 |
| QIU80973.1  | 601 | .....                                                                                                                       | 720 |
| QJQ39524.1  | 601 | .....                                                                                                                       | 720 |
| QJG65957.1  | 601 | .....                                                                                                                       | 720 |
| QJR84873.1  | 601 | .....                                                                                                                       | 720 |
| QKV78084.1  | 601 | .....                                                                                                                       | 720 |
| QJB39236.1  | 601 | .....                                                                                                                       | 720 |
| QJR84969.1  | 601 | .....X.....                                                                                                                 | 720 |
| QJX45333.1  | 601 | .....                                                                                                                       | 720 |
| QIK50427.1  | 601 | .....G.....                                                                                                                 | 720 |
| QIS61338.1  | 601 | .....                                                                                                                       | 720 |
| QJC20993.1  | 601 | .....                                                                                                                       | 720 |
| QIS61468.1  | 601 | .....                                                                                                                       | 720 |
| QIS30105.1  | 601 | .....X.....                                                                                                                 | 720 |
| QKV06235.1  | 601 | .....                                                                                                                       | 720 |
| QJS54814.1  | 601 | .....                                                                                                                       | 720 |
| QIA20044.1  | 601 | .....                                                                                                                       | 720 |
| QJF11959.1  | 601 | .....                                                                                                                       | 720 |
| QJD47202.1  | 601 | .....                                                                                                                       | 720 |
| QJR85701.1  | 601 | .....                                                                                                                       | 720 |
| QKS65788.1  | 601 | .....                                                                                                                       | 720 |
| QIZ13143.1  | 601 | .....                                                                                                                       | 720 |
| QLC94832.1  | 601 | .....                                                                                                                       | 720 |
| QKS89927.1  | 601 | .....                                                                                                                       | 720 |
| QJR87477.1  | 601 | .....H.....                                                                                                                 | 720 |
| QJR86013.1  | 601 | .....                                                                                                                       | 720 |
| QKU53313.1  | 601 | .....                                                                                                                       | 720 |
| QKV07519.1  | 601 | .....                                                                                                                       | 720 |
| QKV74810.1  | 601 | .....                                                                                                                       | 720 |
| QJD48279.1  | 601 | .....                                                                                                                       | 720 |
| QJR94041.1  | 601 | .....                                                                                                                       | 720 |
| QJR85833.1  | 601 | .....                                                                                                                       | 720 |
| QKV38653.1  | 601 | .....                                                                                                                       | 720 |
| QJQ38816.1  | 601 | .....                                                                                                                       | 720 |
| QJR88113.1  | 601 | .....                                                                                                                       | 720 |
| QJR84585.1  | 601 | .....                                                                                                                       | 720 |
| QJR88761.1  | 601 | .....                                                                                                                       | 720 |
| QJG65951.1  | 601 | .....                                                                                                                       | 720 |
| QIZ13861.1  | 601 | .....                                                                                                                       | 720 |
| QIZ13789.1  | 601 | .....G.....I.....                                                                                                           | 720 |
| QRE46016.1  | 601 | .....                                                                                                                       | 720 |
| QIC53204.1  | 601 | .....                                                                                                                       | 720 |
| QJR84957.1  | 601 | .....                                                                                                                       | 720 |
| QKV25357.1  | 601 | .....                                                                                                                       | 720 |

|            |     |         |     |     |
|------------|-----|---------|-----|-----|
| QIJ96493.1 | 601 | .....   | 720 |     |
| QIZ15717.1 | 601 | .....   | 720 |     |
| QKS65584.1 | 601 | .....   | 720 |     |
| QIQ08810.1 | 601 | .....   | 720 |     |
| QJX44586.1 | 601 | .....G  | 720 |     |
| QHR84449.1 | 601 | .....   | 720 |     |
| QIZ14569.1 | 601 | .....   | 720 |     |
| QKG89150.1 | 601 | .....G  | 720 |     |
| QIS60930.1 | 601 | .....   | 720 |     |
| QKV39263.1 | 601 | .....G  | 720 |     |
| QKV37344.1 | 601 | .....   | 720 |     |
| QLC47285.1 | 601 | .....G  | 720 |     |
| QJT72350.1 | 601 | .....   | 720 |     |
| QJR85857.1 | 601 | .....   | 720 |     |
| QJR85965.1 | 601 | .....   | 720 |     |
| QJR84537.1 | 601 | .....   | 720 |     |
| QJQ27878.1 | 601 | .....   | 720 |     |
| QIQ50092.1 | 601 | .....   | 720 |     |
| QKT21158.1 | 601 | .....   | 720 |     |
| QJA17276.1 | 601 | .....G  | 720 |     |
| QIV15164.1 | 601 | .....X  | 720 |     |
| QJS54754.1 | 601 | .....G  | 720 |     |
| QJQ28105.1 | 601 | .....G  | 720 |     |
| QKI36829.1 | 601 | .....   | 720 |     |
| QKG88142.1 | 601 | .....G  | 720 |     |
| QRM76822.1 | 601 | .....   | 720 |     |
| QKN95051.1 | 601 | .....G  | A   | 720 |
| QKS90131.1 | 601 | .....   | 720 |     |
| QIS60978.1 | 601 | .....   | 720 |     |
| QKU31265.1 | 601 | .....   | 720 |     |
| QJX45356.1 | 601 | .....G  | 720 |     |
| QJF11971.1 | 601 | .....X  | 720 |     |
| QJT73010.1 | 601 | .....G  | 720 |     |
| QKU54045.1 | 601 | .....   | 720 |     |
| QIZ13299.1 | 601 | .....   | 720 |     |
| QJT43608.1 | 601 | .....G  | 720 |     |
| QKV06079.1 | 601 | .....G  | 720 |     |
| QIZ64624.1 | 601 | .....   | 720 |     |
| QKS66532.1 | 601 | .....G  | 720 |     |
| QKV42778.1 | 601 | .....G  | 720 |     |
| QKS65656.1 | 601 | .....   | 720 |     |
| QIS60582.1 | 601 | .....G  | 720 |     |
| QJC20391.1 | 601 | .....G  | 720 |     |
| QKU32237.1 | 601 | .....   | 720 |     |
| QIZ13179.1 | 601 | .....   | 720 |     |
| QKV40847.1 | 601 | .....G  | 720 |     |
| QKG90434.1 | 601 | .....G  | 720 |     |
| QKV06175.1 | 601 | .....   | 720 |     |
| QJT43584.1 | 601 | .....G  | 720 |     |
| QKN19803.1 | 601 | .....G  | 720 |     |
| QJT72086.1 | 601 | .....   | 720 |     |
| QJE38606.1 | 601 | .....G  | 720 |     |
| QLC47069.1 | 601 | .....   | 720 |     |
| QJX44574.1 | 601 | .....G  | 720 |     |
| QH200379.1 | 601 | .....   | 720 |     |
| QIU78825.1 | 601 | .....   | 720 |     |
| QKJ68364.1 | 601 | .....G  | 720 |     |
| QKE45704.1 | 601 | .....   | 720 |     |
| QLC46385.1 | 601 | .....G  | 720 |     |
| QLC47117.1 | 601 | .....G  | 720 |     |
| QJX68694.1 | 601 | .....G  | 720 |     |
| QKS91082.1 | 601 | .....G  | 720 |     |
| QJA47775.1 | 601 | .....G  | 720 |     |
| QKG88694.1 | 601 | .....G  | 720 |     |
| QJQ04352.1 | 601 | .....G  | S   | 720 |
| QKV39455.1 | 601 | .....G  | 720 |     |
| QJA42177.1 | 601 | .....G  | 720 |     |
| QKU31085.1 | 601 | .....   | 720 |     |
| QJU11589.1 | 601 | .....X  | 720 |     |
| QKY65277.1 | 601 | .....G  | 720 |     |
| QJT72242.1 | 601 | .....G  | 720 |     |
| QJR88221.1 | 601 | .....G  | 720 |     |
| QJY51864.1 | 601 | .....G  | 720 |     |
| QJX70300.1 | 601 | .....G  | S   | 720 |
| QJR87789.1 | 601 | .....G  | V   | 720 |
| QJX68978.1 | 601 | .....G  | V   | 720 |
| QKV35783.1 | 601 | .....G  | 720 |     |
| QKG86966.1 | 601 | .....G  | 720 |     |
| QJR87261.1 | 601 | .....G  | 720 |     |
| QKE45498.1 | 601 | .....G  | X   | 720 |
| QKV27551.1 | 601 | .....G  | 720 |     |
| QJY39929.1 | 601 | .....   | 720 |     |
| QLC47908.1 | 601 | .....G  | 720 |     |
| QLC92852.1 | 601 | .....G  | 720 |     |
| QKU32141.1 | 601 | .....G  | 720 |     |
| QKO00486.1 | 601 | .....G  | 720 |     |
| QJX69795.1 | 601 | .....G  | 720 |     |
| QJS53410.1 | 601 | .....G  | 720 |     |
| QKU30389.1 | 601 | .....G  | 720 |     |
| QJD23524.1 | 601 | .....   | 720 |     |
| QKN20643.1 | 601 | .....G  | 720 |     |
| QJR88005.1 | 601 | .....G  | 720 |     |
| QJZ28114.1 | 601 | .....G  | V   | 720 |
| QJG65949.1 | 601 | .....   | 720 |     |
| QKG90614.1 | 601 | .....G  | 720 |     |
| QKE45932.1 | 601 | .....G  | Z   | 720 |
| QKE45656.1 | 601 | .....G  | 720 |     |
| QKE44665.1 | 601 | .....G  | V   | 720 |
| QKN20847.1 | 601 | .....G  | 720 |     |
| QIZ16197.1 | 601 | .....G  | 720 |     |
| QJQ38972.1 | 601 | .....G  | 720 |     |
| QKE45824.1 | 601 | .....   | V   | 720 |
| QKU37093.1 | 601 | .....G  | V   | 720 |
| QKU30629.1 | 601 | .....G  | 720 |     |
| QKN19611.1 | 601 | .....G  | 720 |     |
| QKV39024.1 | 601 | .....   | 720 |     |
| QKU31397.1 | 601 | .....G  | 720 |     |
| QJT43572.1 | 601 | .....G  | S   | 720 |
| QJD25529.1 | 601 | .....G  | 720 |     |
| QJX69218.1 | 601 | .....X  | 720 |     |
| QKV37031.1 | 601 | .....G  | 720 |     |
| QJC19491.1 | 601 | .....G  | 720 |     |
| QJR84909.1 | 601 | .....XX | 720 |     |
| QJD47718.1 | 601 | .....   | 720 |     |

|             |     |         |     |
|-------------|-----|---------|-----|
| QJC20043.1  | 601 | .....G  | 720 |
| QIQ49882.1  | 601 | .....G  | 720 |
| QLA09870.1  | 601 | .....G  | 720 |
| QKU31901.1  | 601 | .....G  | 720 |
| QJQ84640.1  | 601 | .....G  | 720 |
| QLC48016.1  | 601 | .....G  | 720 |
| QJI53955.1  | 601 | .....G  | 720 |
| QKK12815.1  | 601 | .....G  | 720 |
| QKR85081.1  | 601 | .....G  | 720 |
| QKV05911.1  | 601 | .....G  | 720 |
| QJA17468.1  | 601 | .....G  | 720 |
| QIZ264470.1 | 601 | .....G  | 720 |
| QJD47358.1  | 601 | .....G  | 720 |
| QJD25085.1  | 601 | .....G  | 720 |
| QJA17596.1  | 601 | .....G  | 720 |
| QJF77194.1  | 601 | .....G  | 720 |
| QKG86990.1  | 601 | .....G  | 720 |
| QKQ63616.1  | 601 | .....G  | 720 |
| QJS54898.1  | 601 | .....G  | 720 |
| QKU31205.1  | 601 | .....G  | 720 |
| QJQ83944.1  | 601 | .....G  | 720 |
| QJD24377.1  | 601 | .....G  | 720 |
| QJT72278.1  | 601 | .....F  | 720 |
| QKG89918.1  | 601 | .....G  | 720 |
| QKV38964.1  | 601 | .....G  | 720 |
| QKV40775.1  | 601 | .....G  | 720 |
| QKE61804.1  | 601 | .....G  | 720 |
| QJF76438.1  | 601 | .....G  | 720 |
| QKN19515.1  | 601 | .....G  | 720 |
| QIZ264530.1 | 601 | .....G  | 720 |
| QKY77964.1  | 601 | .....X  | 720 |
| QJR89217.1  | 601 | .....G  | 720 |
| QJR86037.1  | 601 | .....G  | 720 |
| QKY60121.1  | 601 | .....G  | 720 |
| QKW89191.1  | 601 | .....G  | 720 |
| QKS91031.1  | 601 | .....G  | 720 |
| QJX69482.1  | 601 | .....G  | 720 |
| QKG88946.1  | 601 | .....G  | 720 |
| QJS57267.1  | 601 | .....G  | 720 |
| QJT43452.1  | 601 | .....G  | 720 |
| QKU32081.1  | 601 | .....G  | 720 |
| QJS56895.1  | 601 | .....G  | 720 |
| QJS53578.1  | 601 | .....G  | 720 |
| QKU31133.1  | 601 | .....G  | 720 |
| QJZ32209.1  | 601 | .....G  | 720 |
| QIS30295.1  | 601 | .....G  | 720 |
| QJC20367.1  | 601 | .....G  | 720 |
| QJX44430.1  | 601 | .....G  | 720 |
| QIZ297051.1 | 601 | .....G  | 720 |
| QKU32465.1  | 601 | .....G  | 720 |
| QJD47442.1  | 601 | .....G  | 720 |
| QJS39543.1  | 601 | .....G  | 720 |
| QJR87909.1  | 601 | .....G  | 720 |
| QJW69235.1  | 601 | .....G  | 720 |
| QJU70329.1  | 601 | .....G  | 720 |
| QKV06379.1  | 601 | .....G  | 720 |
| QJU70545.1  | 601 | .....G  | 720 |
| QJQ82996.1  | 601 | .....G  | 720 |
| QIZ264578.1 | 601 | .....G  | 720 |
| QKE45692.1  | 601 | .....G  | 720 |
| QJR94641.1  | 601 | .....G  | 720 |
| QKR84321.1  | 601 | .....G  | 720 |
| QIZ15969.1  | 601 | .....G  | 720 |
| QKU32045.1  | 601 | .....G  | 720 |
| QJX70519.1  | 601 | .....G  | 720 |
| QJS39507.1  | 601 | .....G  | 720 |
| QJX44634.1  | 601 | .....G  | 720 |
| QJR84369.1  | 601 | .....G  | 720 |
| QIX13999.1  | 601 | .....G  | 720 |
| QJS57135.1  | 601 | .....G  | 720 |
| QKE45884.1  | 601 | .....G  | 720 |
| QJX68786.1  | 601 | .....G  | 720 |
| QLC91688.1  | 601 | .....G  | 720 |
| QKG81727.1  | 601 | .....G  | 720 |
| QJH92167.1  | 601 | .....G  | 720 |
| QLB38609.1  | 601 | .....G  | 720 |
| QJA17632.1  | 601 | .....G  | 720 |
| QKG89462.1  | 601 | .....G  | 720 |
| QKN19755.1  | 601 | .....G  | 720 |
| QJB39021.1  | 601 | .....G  | 720 |
| QJF75443.1  | 601 | .....G  | 720 |
| QJR85569.1  | 601 | .....G  | 720 |
| QKE53933.1  | 601 | .....G  | 720 |
| QIS30615.1  | 601 | .....G  | 720 |
| QJS39627.1  | 601 | .....G  | 720 |
| QKQ76630.1  | 601 | .....G  | 720 |
| QKU53553.1  | 601 | .....G  | 720 |
| QJW00291.1  | 601 | .....G  | 720 |
| QJS54106.1  | 601 | .....G  | 720 |
| QKV35267.1  | 601 | .....G  | 720 |
| QIZ15645.1  | 601 | .....G  | 720 |
| QKU37621.1  | 601 | .....G  | 720 |
| QJA17192.1  | 601 | .....G  | 720 |
| QJX45007.1  | 601 | .....G  | 720 |
| QJT43704.1  | 601 | .....G  | 720 |
| QJR87465.1  | 601 | .....G  | 720 |
| QJA17524.1  | 601 | .....X  | 720 |
| QJR88497.1  | 601 | .....G  | 720 |
| QKE50930.1  | 601 | .....G  | 720 |
| QKU32765.1  | 601 | .....G  | 720 |
| QKU33389.1  | 601 | .....G  | 720 |
| QJX68658.1  | 601 | .....G  | 720 |
| QKJ68497.1  | 601 | .....HG | 720 |
| QIZ13765.1  | 601 | .....GF | 720 |
| QKU31721.1  | 601 | .....G  | 720 |
| QKX47945.1  | 601 | .....G  | 720 |
| QJD23273.1  | 601 | .....G  | 720 |
| QJR86313.1  | 601 | .....G  | 720 |
| QJF75779.1  | 601 | .....G  | 720 |
| QLC91064.1  | 601 | .....G  | 720 |
| QIS30115.1  | 601 | .....G  | 720 |
| QJR87957.1  | 601 | .....G  | 720 |
| QJX68418.1  | 601 | .....G  | 720 |
| QJR93333.1  | 601 | .....G  | 720 |

|            |     |         |     |
|------------|-----|---------|-----|
| QKU32429.1 | 601 | .....G  | 720 |
| QKJ68737.1 | 601 | .....G  | 720 |
| QIZ15585.1 | 601 | .....G  | 720 |
| QJX69134.1 | 601 | .....G  | 720 |
| QJG65954.1 | 601 | .....G  | 720 |
| QKO25674.1 | 601 | .....G  | 720 |
| QJS53386.1 | 601 | .....G  | 720 |
| QRN19911.1 | 601 | .....G  | 720 |
| QKI28601.1 | 601 | .....G  | 720 |
| QKV38988.1 | 601 | .....G  | 720 |
| QJU70245.1 | 601 | .....G  | 720 |
| QKO25794.1 | 601 | .....G  | 720 |
| QJY40061.1 | 601 | .....G  | 720 |
| BCG67531.1 | 601 | .....G  | 720 |
| QKV40583.1 | 601 | .....G  | 720 |
| QJD47800.1 | 601 | .....G  | 720 |
| QKE50894.1 | 601 | .....G  | 720 |
| QIU78719.1 | 601 | .....G  | 720 |
| QKV35279.1 | 601 | .....G  | 720 |
| QJR87897.1 | 601 | .....G  | 720 |
| QKE61684.1 | 601 | .....G  | 720 |
| QJR87321.1 | 601 | .....G  | 720 |
| QRN61217.1 | 601 | .....W  | 720 |
| QJX70327.1 | 601 | .....G  | 720 |
| QJX70251.1 | 601 | .....G  | 720 |
| QKO25770.1 | 601 | .....G  | 720 |
| QKU31445.1 | 601 | .....G  | 720 |
| QKG86786.1 | 601 | .....G  | 720 |
| QJQ27854.1 | 601 | .....G  | 720 |
| QKG89558.1 | 601 | .....G  | 720 |
| QKV38532.1 | 601 | .....G  | 720 |
| QLA47679.1 | 601 | .....G  | 720 |
| QJR84729.1 | 601 | .....XX | 720 |
| QKX47933.1 | 601 | .....G  | 720 |
| QKU30329.1 | 601 | .....G  | 720 |
| QJC20343.1 | 601 | .....G  | 720 |
| QRN20943.1 | 601 | .....G  | 720 |
| QKC05236.1 | 601 | .....G  | 720 |
| QKV25225.1 | 601 | .....X  | 720 |
| QRN19995.1 | 601 | .....G  | 720 |
| BCG44664.1 | 601 | .....G  | 720 |
| QJY39881.1 | 601 | .....G  | 720 |
| QJQ83680.1 | 601 | .....G  | 720 |
| QKX47969.1 | 601 | .....G  | 720 |
| QJD48543.1 | 601 | .....G  | 720 |
| QLC47920.1 | 601 | .....G  | 720 |
| QKV37536.1 | 601 | .....G  | 720 |
| QJR94065.1 | 601 | .....G  | 720 |
| QKU31121.1 | 601 | .....G  | 720 |
| QKG81475.1 | 601 | .....G  | 720 |
| QJF75335.1 | 601 | .....G  | 720 |
| QJX45307.1 | 601 | .....G  | 720 |
| QKV37584.1 | 601 | .....G  | 720 |
| QKU37501.1 | 601 | .....G  | 720 |
| QJS54286.1 | 601 | .....G  | 720 |
| QJG65952.1 | 601 | .....G  | 720 |
| QRN19551.1 | 601 | .....G  | 720 |
| QJR86781.1 | 601 | .....G  | 720 |
| QJG65958.1 | 601 | .....G  | 720 |
| QKQ63760.1 | 601 | .....G  | 720 |
| QJF78056.1 | 601 | .....G  | 720 |
| QKE51026.1 | 601 | .....G  | 720 |
| QJR93153.1 | 601 | .....G  | 720 |
| QJX44562.1 | 601 | .....G  | 720 |
| QKJ68605.1 | 601 | .....G  | 720 |
| QIZ64685.1 | 601 | .....H  | 720 |
| QKX47981.1 | 601 | .....G  | 720 |
| QKU53445.1 | 601 | .....G  | 720 |
| QJE38546.1 | 601 | .....G  | 720 |
| QJZ27921.1 | 601 | .....L  | 720 |
| QJT72806.1 | 601 | .....X  | 720 |
| QLC47597.1 | 601 | .....G  | 720 |
| QJQ84364.1 | 601 | .....G  | 720 |
| QJI53943.1 | 601 | .....G  | 720 |
| QKV49386.1 | 601 | .....Q  | 720 |
| QKO24139.1 | 601 | .....G  | 720 |
| QJF76906.1 | 601 | .....G  | 720 |
| QJF76750.1 | 600 | .....G  | 719 |
| QJS57039.1 | 601 | .....G  | 720 |
| QRN20763.1 | 601 | .....G  | 720 |
| QKX46299.1 | 601 | .....G  | 720 |
| QKU37885.1 | 601 | .....G  | 720 |
| QLC47896.1 | 601 | .....F  | 720 |
| QJY40469.1 | 601 | .....G  | 720 |
| QJI07354.1 | 601 | .....G  | 720 |
| QJZ28347.1 | 601 | .....G  | 720 |
| QKV42838.1 | 601 | .....G  | 720 |
| QJY40289.1 | 601 | .....G  | 720 |
| QKM76906.1 | 601 | .....G  | 720 |
| QJF11812.1 | 601 | .....G  | 720 |
| QKG91034.1 | 601 | .....G  | 720 |
| QIU80949.1 | 601 | .....G  | 720 |
| QJD48915.1 | 601 | .....G  | 720 |
| QKU31505.1 | 601 | .....G  | 720 |
| QJR90981.1 | 601 | .....G  | 720 |
| QJR84441.1 | 601 | .....G  | 720 |
| QLA10140.1 | 601 | .....G  | 720 |
| QKQ90986.1 | 601 | .....G  | 720 |
| QKU32273.1 | 601 | .....G  | 720 |
| QKG86870.1 | 601 | .....G  | 720 |
| QJR86997.1 | 601 | .....G  | 720 |
| QKX65028.1 | 601 | .....G  | 720 |
| QJQ83764.1 | 601 | .....G  | 720 |
| QKR84357.1 | 601 | .....X  | 720 |
| QJD23609.1 | 601 | .....G  | 720 |
| QKS89843.1 | 601 | .....G  | 720 |
| QJY40517.1 | 601 | .....G  | 720 |
| QJZ28203.1 | 601 | .....G  | 720 |
| QJX45344.1 | 601 | .....G  | 720 |
| QJU11577.1 | 601 | .....X  | 720 |
| QJQ84280.1 | 601 | .....G  | 720 |
| QJT72614.1 | 601 | .....I  | 720 |
| QLC46853.1 | 601 | .....G  | 720 |
| QJC19935.1 | 601 | .....G  | 720 |



|            |     |               |   |            |   |     |
|------------|-----|---------------|---|------------|---|-----|
| KQG89750.1 | 601 | .....         |   |            |   | 720 |
| QJF75455.1 | 601 | .....G        |   |            |   | 720 |
| QJR95097.1 | 601 | .....         |   |            |   | 720 |
| QJD47130.1 | 601 | .....G        |   |            |   | 720 |
| QJA16640.1 | 601 | .....G        |   |            |   | 720 |
| QJS54742.1 | 597 | .....         |   |            |   | 716 |
| QRU31961.1 | 601 | .....G        |   |            |   | 720 |
| QRR86269.1 | 601 | .....G        |   |            |   | 720 |
| QRV37308.1 | 601 | .....         |   |            |   | 720 |
| QKE49364.1 | 601 | .....         |   |            |   | 720 |
| QRV37284.1 | 601 | .....G        |   |            |   | 720 |
| QRU53985.1 | 601 | .....         |   |            |   | 720 |
| QJR88737.1 | 601 | .....G        |   |            |   | 720 |
| QJR89181.1 | 601 | .....G        |   |            |   | 720 |
| QJI54098.1 | 601 | .....         |   |            |   | 720 |
| QJD47658.1 | 601 | .....G        |   |            |   | 720 |
| QJR90753.1 | 601 | .....         |   | X          |   | 720 |
| QJQ39944.1 | 601 | .....G        |   |            |   | 720 |
| QJR84561.1 | 601 | .....XXXXXX   |   |            |   | 720 |
| QIS30525.1 | 601 | .....         |   |            |   | 720 |
| QJW00459.1 | 601 | .....G        |   |            |   | 720 |
| QRV37236.1 | 601 | .....G        |   |            |   | 720 |
| QKE44989.1 | 601 | .....XXXXXX   |   |            |   | 720 |
| QLC47621.1 | 601 | .....G        |   |            |   | 720 |
| QRV38725.1 | 601 | .....G        |   |            |   | 720 |
| QRR84745.1 | 601 | .....G        |   |            |   | 720 |
| QRX65088.1 | 601 | .....G        |   |            |   | 720 |
| QLC47704.1 | 601 | .....G        |   |            |   | 720 |
| QRX65100.1 | 601 | .....G        |   |            | H | 720 |
| QLC46361.1 | 601 | .....         |   |            |   | 720 |
| QJR93357.1 | 601 | .....         |   |            |   | 720 |
| QKR84420.1 | 601 | .....X        |   |            |   | 720 |
| QJQ39068.1 | 601 | .....G        |   |            |   | 720 |
| QKR84697.1 | 601 | .....G        |   |            |   | 720 |
| QKE46004.1 | 601 | .....         |   | XXXXXX     |   | 720 |
| QJD49071.1 | 601 | .....         |   |            |   | 720 |
| KQG87086.1 | 601 | .....G        |   |            |   | 720 |
| QJQ39812.1 | 601 | .....G        |   |            |   | 720 |
| QJR85497.1 | 601 | .....G        |   |            |   | 720 |
| QJY51780.1 | 601 | .....G        |   |            |   | 720 |
| QKE49172.1 | 601 | .....         |   |            |   | 720 |
| QRU28426.1 | 601 | .....         |   |            |   | 720 |
| QJS57231.1 | 601 | .....         |   |            |   | 720 |
| QJW69139.1 | 601 | .....G        |   |            |   | 720 |
| QJZ28359.1 | 601 | .....G        |   |            |   | 720 |
| QJR89229.1 | 601 | .....G        |   |            |   | 720 |
| QJA16508.1 | 601 | .....G        |   |            |   | 720 |
| QRV38028.1 | 601 | .....G        |   |            |   | 720 |
| QJF76414.1 | 601 | .....G        |   |            |   | 720 |
| QJR89157.1 | 601 | .....G        |   |            |   | 720 |
| QJR84945.1 | 601 | .....XXXXXXXX |   |            |   | 720 |
| QKE45740.1 | 601 | .....         |   | XXXXXXXXXX |   | 720 |
| QRV35843.1 | 601 | .....G        |   |            |   | 720 |
| QJQ82804.1 | 601 | .....G        |   |            |   | 720 |
| QKG88730.1 | 601 | .....G        |   |            |   | 720 |
| QKG91130.1 | 601 | .....         |   |            |   | 720 |
| QJF76163.1 | 601 | .....         |   | H          |   | 720 |
| QJR89337.1 | 601 | .....G        |   |            |   | 720 |
| QJQ38624.1 | 601 | .....         | X |            |   | 720 |
| QJR88425.1 | 601 | .....G        |   |            |   | 720 |
| QJR93081.1 | 601 | .....G        |   |            |   | 720 |
| QRV37464.1 | 601 | .....G        |   |            |   | 720 |
| QJC20415.1 | 601 | .....         |   |            |   | 720 |
| QRV37452.1 | 601 | .....         |   |            |   | 720 |
| QRU54477.1 | 601 | .....G        |   |            |   | 720 |
| QJD48099.1 | 601 | .....         |   |            |   | 720 |
| QKE45025.1 | 601 | .....G        |   |            |   | 720 |
| QJX69507.1 | 601 | .....G        |   |            |   | 720 |
| QJQ83164.1 | 601 | .....         |   | XXXXXXXXXX |   | 720 |
| QJR93561.1 | 601 | .....G        | X |            |   | 720 |
| QRU37477.1 | 601 | .....         |   | XXXXXXXXXX |   | 720 |
| QIQ50102.1 | 601 | .....         |   |            |   | 720 |
| QRU53709.1 | 601 | .....         |   | X          |   | 720 |
| QJD48759.1 | 601 | .....         |   |            |   | 720 |
| QJR89313.1 | 601 | .....         | X |            |   | 720 |
| QRV38761.1 | 601 | .....G        |   |            |   | 720 |
| QRV38052.1 | 601 | .....G        |   |            |   | 720 |
| QRV38520.1 | 601 | .....         |   |            |   | 720 |
| QJR85905.1 | 601 | .....         |   |            |   | 720 |
| QJR85677.1 | 601 | .....G        |   |            |   | 720 |
| QJX45271.1 | 601 | .....G        |   |            |   | 720 |
| QKS91043.1 | 601 | .....         |   |            |   | 720 |
| QJF74903.1 | 601 | .....G        |   |            |   | 720 |
| QJR90297.1 | 601 | .....G        |   |            |   | 720 |
| QIU81213.1 | 601 | .....G        |   |            |   | 720 |
| QRV38544.1 | 601 | .....G        |   |            |   | 720 |
| QJF75419.1 | 601 | .....G        |   |            |   | 720 |
| QKE45037.1 | 601 | .....G        |   |            |   | 720 |
| QJX44490.1 | 589 | .....G        |   |            |   | 708 |
| QLB39320.1 | 601 | .....G        |   |            |   | 720 |
| QJX44454.1 | 588 | .....G        |   |            |   | 707 |
| QIZ14917.1 | 601 | .....         |   |            |   | 720 |
| QKR86449.1 | 601 | .....G        |   |            |   | 720 |
| QJX69627.1 | 601 | .....G        |   |            |   | 720 |
| QRN19575.1 | 601 | .....G        |   |            |   | 720 |
| QJC19995.1 | 601 | .....G        |   |            |   | 720 |
| QRV37512.1 | 601 | .....G        |   |            |   | 720 |
| QIS60558.1 | 601 | .....         |   |            |   | 720 |
| QJE39109.1 | 601 | .....         |   |            |   | 720 |
| QRV39252.1 | 601 | .....         |   |            |   | 720 |
| QJR95349.1 | 601 | .....G        |   |            |   | 720 |
| QJR87645.1 | 601 | .....G        |   |            |   | 720 |
| QKS67443.1 | 601 | .....G        |   |            |   | 710 |
| QIS30645.1 | 601 | .....         |   |            |   | 720 |
| QJD25442.1 | 588 | .....G        |   |            |   | 707 |
| QKR84541.1 | 601 | .....         |   |            |   | 720 |
| QJR91905.1 | 601 | .....         |   |            |   | 720 |
| QIZ13069.1 | 601 | .....G        |   |            |   | 720 |
| QJQ39032.1 | 601 | .....G        |   |            |   | 720 |
| QKS90047.1 | 601 | .....         |   |            |   | 720 |
| QJY51804.1 | 601 | .....G        |   |            |   | 720 |
| QKS89975.1 | 601 | .....         |   |            |   | 720 |
| QJR89277.1 | 601 | .....G        |   |            |   | 720 |
| QRV07399.1 | 601 | .....         |   |            |   | 720 |

|             |     |                       |     |
|-------------|-----|-----------------------|-----|
| QJR84345.1  | 601 | .....                 | 720 |
| QJI54335.1  | 601 | .....                 | 720 |
| QKV37572.1  | 601 | .....                 | 720 |
| QJF76534.1  | 601 | .....G                | 720 |
| QKV37908.1  | 601 | .....G                | 720 |
| QJC19863.1  | 601 | .....                 | 720 |
| QKV38617.1  | 601 | .....                 | 720 |
| QJQ83512.1  | 601 | .....G                | 720 |
| QJR86733.1  | 601 | .....G                | 720 |
| QLC47165.1  | 601 | .....G                | 720 |
| QJX70119.1  | 601 | .....G                | 720 |
| QJR91353.1  | 601 | .....G                | 720 |
| QJD24617.1  | 601 | .....G                | 720 |
| QLB39105.1  | 601 | .....                 | 720 |
| QIS30225.1  | 601 | .....G                | 720 |
| QKV25801.1  | 601 | .....G                | 720 |
| QJA16868.1  | 601 | .....                 | 720 |
| QKV06403.1  | 601 | .....                 | 720 |
| QJR95361.1  | 601 | .....G                | 720 |
| QIQ49902.1  | 601 | .....                 | 720 |
| QKE49074.1  | 601 | .....G                | 720 |
| QJR89361.1  | 601 | .....                 | 720 |
| QKG89570.1  | 601 | .....G                | 720 |
| QJQ38804.1  | 601 | .....                 | 720 |
| QJR95109.1  | 601 | .....G                | 720 |
| QJR87945.1  | 601 | .....                 | 720 |
| QKV39839.1  | 601 | .....G                | 720 |
| QJR87777.1  | 601 | .....G                | 720 |
| QKR84637.1  | 601 | .....                 | 720 |
| QI213569.1  | 601 | .....G                | 720 |
| QKV38677.1  | 601 | .....                 | 720 |
| QJR93297.1  | 601 | .....G                | 720 |
| QJR87489.1  | 601 | .....G                | 720 |
| QJR89397.1  | 601 | .....G                | 720 |
| QJR84657.1  | 601 | .....XXXXXXXXXXXXXXXX | 720 |
| QKV35735.1  | 601 | .....G                | 720 |
| QJR85977.1  | 601 | .....                 | 720 |
| QJR84753.1  | 601 | .....XXXX             | 720 |
| QJD24099.1  | 601 | .....G                | 720 |
| QJD47586.1  | 601 | .....G                | 720 |
| QJR87633.1  | 601 | .....                 | 720 |
| QKG87818.1  | 601 | .....G                | 720 |
| QJR91281.1  | 601 | .....                 | 720 |
| QJR87081.1  | 601 | .....G                | 720 |
| QJA16580.1  | 601 | .....G                | 720 |
| QJR86829.1  | 601 | .....                 | 720 |
| QKV38833.1  | 601 | .....                 | 720 |
| QJR91257.1  | 601 | .....G                | 720 |
| QJD25349.1  | 601 | .....G                | 720 |
| QJQ38996.1  | 601 | .....G                | 720 |
| QJR86625.1  | 601 | .....G                | 720 |
| QKV25165.1  | 601 | .....G                | 720 |
| QJD23153.1  | 601 | .....G                | 720 |
| QJR94617.1  | 601 | .....                 | 720 |
| QKK14100.1  | 601 | .....G                | 720 |
| QKR84805.1  | 601 | .....G                | 720 |
| QJR93801.1  | 601 | .....                 | 720 |
| QIS61374.1  | 601 | .....                 | 720 |
| QJR90345.1  | 601 | .....G                | 720 |
| QJE39097.1  | 601 | .....                 | 720 |
| QJR86937.1  | 601 | .....                 | 720 |
| QKS88322.1  | 601 | .....G                | 720 |
| QJR95301.1  | 601 | .....                 | 720 |
| QJR90501.1  | 601 | .....G                | 720 |
| QIS60822.1  | 601 | .....G                | 720 |
| QKN161229.1 | 592 | .....                 | 706 |
| QJI54086.1  | 601 | .....                 | 720 |
| QJD24809.1  | 601 | .....G                | 720 |
| QJF76474.1  | 601 | .....G                | 720 |
| QKV05983.1  | 601 | .....XX               | 720 |
| QJD47214.1  | 601 | .....G                | 720 |
| QKR84925.1  | 601 | .....G                | 720 |
| QKU54537.1  | 593 | .....                 | 712 |
| QKS89867.1  | 601 | .....                 | 720 |
| QKK14335.1  | 601 | .....G                | 720 |
| QJR84549.1  | 601 | .....                 | 720 |
| QJR93861.1  | 601 | .....G                | 720 |
| QJF77050.1  | 601 | .....G                | 720 |
| QKR84841.1  | 601 | .....G                | 720 |
| QKV06355.1  | 601 | .....                 | 720 |
| QIV65022.1  | 601 | .....                 | 720 |
| QJX68586.1  | 601 | .....G                | 720 |
| QJR90717.1  | 601 | .....                 | 720 |
| QJD47478.1  | 601 | .....G                | 720 |
| QJR90465.1  | 601 | .....G                | 720 |
| QJI54229.1  | 601 | .....                 | 720 |
| QJQ39440.1  | 601 | .....G                | 720 |
| QJF76990.1  | 601 | .....G                | 720 |
| QLC47681.1  | 601 | .....G                | 720 |
| QKU53721.1  | 601 | .....                 | 720 |
| QJF75239.1  | 601 | .....G                | 720 |
| QKR86605.1  | 601 | .....                 | 720 |
| QKG88970.1  | 601 | .....G                | 720 |
| QJR86589.1  | 601 | .....G                | 720 |
| QJR94953.1  | 601 | .....                 | 720 |
| QJE39038.1  | 601 | .....                 | 720 |
| QJS54766.1  | 601 | .....G                | 720 |
| QJZ32221.1  | 601 | .....G                | 720 |
| QI214437.1  | 601 | .....G                | 720 |
| QJR84705.1  | 601 | .....                 | 720 |
| QKF96007.1  | 574 | .....G                | 693 |
| QIS61528.1  | 600 | .....                 | 719 |
| QKV37728.1  | 601 | .....                 | 720 |
| QKV38568.1  | 601 | .....                 | 720 |
| QJR94257.1  | 601 | .....G                | 720 |
| QKS89831.1  | 601 | .....                 | 720 |
| QKV37752.1  | 601 | .....G                | 720 |
| QKR84889.1  | 601 | .....                 | 720 |
| QLC46721.1  | 601 | .....G                | 720 |
| QJR87177.1  | 601 | .....G                | 720 |
| QKY77928.1  | 601 | .....                 | 720 |
| QKV40427.1  | 601 | .....G                | 720 |
| QKU28486.1  | 601 | .....                 | 720 |
| QLC47800.1  | 601 | .....G                | 720 |

|            |     |                  |     |
|------------|-----|------------------|-----|
| QJR94497.1 | 601 | .....G           | 720 |
| QKG87146.1 | 601 | .....G           | 720 |
| QKG87794.1 | 601 | .....G           | 720 |
| QKV37704.1 | 601 | .....G           | 720 |
| QJD47310.1 | 601 | .....G           | 720 |
| QJR91317.1 | 601 | .....G           | 720 |
| QKR85153.1 | 601 | .....G           | 720 |
| QJI54383.1 | 601 | .....G           | 720 |
| QJR94725.1 | 601 | .....G           | 720 |
| QKR85069.1 | 601 | .....G           | 720 |
| QJD47298.1 | 601 | .....G           | 720 |
| QKG90230.1 | 601 | .....G           | 720 |
| QIZ14353.1 | 601 | .....G           | 720 |
| QIQ49922.1 | 601 | .....G           | 720 |
| QIS30135.1 | 601 | .....G           | 720 |
| QJR94929.1 | 601 | .....G           | 720 |
| QIV65044.1 | 601 | .....G           | 720 |
| QKV25873.1 | 601 | .....G           | 720 |
| QLC47848.1 | 601 | .....G           | 720 |
| QJR91641.1 | 601 | .....G           | 720 |
| QLC46949.1 | 601 | .....G           | 720 |
| QKK14233.1 | 601 | .....G           | 720 |
| QKG90722.1 | 601 | .....G           | 720 |
| QKU53301.1 | 601 | .....G           | 720 |
| QJD48507.1 | 601 | .....G           | 720 |
| QJR89385.1 | 601 | .....G           | 720 |
| QLC47465.1 | 601 | .....G           | 720 |
| QJR92001.1 | 601 | .....G           | 720 |
| QLC46157.1 | 601 | .....G           | 720 |
| QKR84997.1 | 601 | .....G           | 720 |
| QKU53229.1 | 601 | .....G           | 720 |
| QJD23249.1 | 601 | .....G           | 720 |
| QKV25129.1 | 601 | .....G           | 720 |
| QJD24315.1 | 601 | .....G           | 720 |
| QJR89937.1 | 601 | .....G           | 720 |
| QJA17180.1 | 601 | .....G           | 720 |
| QKU53385.1 | 601 | .....G           | 720 |
| QJR86721.1 | 601 | .....G           | 720 |
| QKV38040.1 | 601 | .....G           | 720 |
| QKG87050.1 | 601 | .....G           | 720 |
| QJD23907.1 | 601 | .....G           | 720 |
| QJI54122.1 | 601 | .....G           | 720 |
| QJR90681.1 | 601 | .....G           | 720 |
| QJR92985.1 | 601 | .....G           | 720 |
| QJD23379.1 | 601 | .....G           | 720 |
| QKU52869.1 | 601 | .....G           | 720 |
| QKR84649.1 | 601 | .....G           | 720 |
| QKE44749.1 | 601 | .....G           | 720 |
| QJR87249.1 | 601 | .....G           | 720 |
| QKN20583.1 | 566 | .....G           | 685 |
| QJR92637.1 | 601 | .....G           | 720 |
| QJR89445.1 | 601 | .....G           | 720 |
| QJE39121.1 | 601 | .....X..X.....X. | 720 |
| QJR94569.1 | 601 | .....G           | 720 |
| QJI54371.1 | 601 | .....G           | 720 |
| QJR90513.1 | 601 | .....G           | 720 |
| QJR86109.1 | 601 | .....G           | 720 |
| QLC46241.1 | 601 | .....G           | 720 |
| QKG87638.1 | 601 | .....G           | 720 |
| QJR93873.1 | 601 | .....G           | 720 |
| QJE74963.1 | 601 | .....G           | 720 |
| QKV38785.1 | 601 | .....G           | 720 |
| QKV37692.1 | 601 | .....G           | 720 |
| QIZ13647.1 | 601 | .....G           | 720 |
| QJR94305.1 | 601 | .....G           | 720 |
| QJR93417.1 | 601 | .....G           | 720 |
| QLC46961.1 | 601 | .....G           | 720 |
| QKV60189.1 | 601 | .....G           | 720 |
| QKR85429.1 | 601 | .....G           | 720 |
| QIZ14195.1 | 601 | .....G           | 720 |
| QJD23775.1 | 601 | .....G           | 720 |
| QKK14185.1 | 601 | .....G           | 720 |
| QJE38978.1 | 601 | .....G           | 720 |
| QKK14076.1 | 601 | .....G           | 720 |
| QKU52845.1 | 601 | .....G           | 720 |
| QKG89666.1 | 601 | .....G           | 720 |
| QKE12094.1 | 601 | .....G           | 720 |
| QKV25429.1 | 561 | .....G           | 680 |
| QJC20714.1 | 601 | .....G           | 720 |
| QJS54730.1 | 601 | .....G           | 720 |
| QKV60177.1 | 601 | .....G           | 720 |
| QKG87806.1 | 601 | .....G           | 720 |
| QKG88838.1 | 601 | .....G           | 720 |
| QLC47776.1 | 561 | .....G           | 680 |
| QJZ32186.1 | 601 | .....G           | 720 |
| QKS89903.1 | 601 | .....G           | 720 |
| QJR94809.1 | 601 | .....G           | 720 |
| QKR85609.1 | 601 | .....G           | 720 |
| QJR84849.1 | 601 | .....G           | 720 |
| QKV35447.1 | 601 | .....G           | 720 |
| QJP74891.1 | 601 | .....G           | 720 |
| QKU31313.1 | 601 | .....G           | 720 |
| QJR90321.1 | 601 | .....G           | 720 |
| QKV08263.1 | 601 | .....G           | 720 |
| QJR88929.1 | 601 | .....G           | 720 |
| QJD23283.1 | 601 | .....G           | 720 |
| QKR86245.1 | 601 | .....G           | 720 |
| QKV42946.1 | 601 | .....G           | 720 |
| QJR93237.1 | 601 | .....G           | 720 |
| QJV51648.1 | 601 | .....G           | 720 |
| QJR91029.1 | 601 | .....G           | 720 |
| QIS60606.1 | 601 | .....G           | 720 |
| QJX68394.1 | 601 | .....G           | 720 |
| QLC46709.1 | 601 | .....G           | 720 |
| QJR94893.1 | 601 | .....G           | 720 |
| QIU81657.1 | 601 | .....G           | 720 |
| QKR85309.1 | 601 | .....G           | 720 |
| QJR86601.1 | 601 | .....G           | 720 |
| QKV38857.1 | 601 | .....G           | 720 |
| QKU32297.1 | 601 | .....G           | 720 |
| QKK14112.1 | 601 | .....G           | 720 |
| QJC20475.1 | 601 | .....G           | 720 |
| QJR90561.1 | 601 | .....G           | 720 |
| QJZ32129.1 | 601 | .....G           | 720 |



|            |     |                                   |     |
|------------|-----|-----------------------------------|-----|
| QJD48819.1 | 601 | .....                             | 720 |
| QJR86877.1 | 601 | .....G                            | 720 |
| QJR89205.1 | 601 | .....G                            | 720 |
| QJA17432.1 | 601 | .....G                            | 720 |
| QIU81369.1 | 601 | .....G                            | 720 |
| QIS60654.1 | 601 | .....G                            | 720 |
| QIZ13895.1 | 601 | .....                             | 720 |
| QKR85237.1 | 601 | .....G                            | 720 |
| QKU53733.1 | 601 | .....                             | 720 |
| QJR94221.1 | 601 | .....                             | 720 |
| QIZ14833.1 | 601 | .....G                            | 720 |
| QJR91149.1 | 601 | .....G                            | 720 |
| QKR84466.1 | 601 | .....                             | 720 |
| QKV37740.1 | 601 | .....                             | 720 |
| QKR86185.1 | 601 | .....G                            | 720 |
| QKV67308.1 | 601 | .....                             | 720 |
| QKV08047.1 | 601 | .....G                            | 720 |
| QKR84961.1 | 601 | .....                             | 720 |
| QIS30595.1 | 601 | .....                             | 720 |
| QKG87014.1 | 601 | .....G                            | 720 |
| QJR94377.1 | 601 | .....G                            | 720 |
| QJC20259.1 | 601 | .....G                            | 720 |
| QJR86661.1 | 601 | .....G                            | 720 |
| QJF77278.1 | 601 | .....G                            | 720 |
| QKR85093.1 | 601 | .....G                            | 720 |
| QJR93141.1 | 601 | .....                             | 720 |
| QKV37944.1 | 601 | .....G                            | 720 |
| QKR85177.1 | 601 | .....G                            | 720 |
| QJD47610.1 | 601 | .....G                            | 720 |
| QJR91737.1 | 601 | .....G                            | 720 |
| QKU32789.1 | 601 | .....                             | 720 |
| QKR85249.1 | 601 | .....G                            | 720 |
| QKU52833.1 | 601 | .....                             | 720 |
| QKV38773.1 | 601 | .....XXXXXXXXXXXXXXXXXXXXXXXXXXXX | 720 |
| QJC19887.1 | 601 | .....G                            | 720 |
| QKV37224.1 | 601 | .....G                            | 720 |
| QJR94401.1 | 601 | .....G                            | 720 |
| QJF76462.1 | 601 | .....G                            | 720 |
| QJI54026.1 | 601 | .....                             | 720 |
| QKG87302.1 | 601 | .....G                            | 720 |
| QIV65000.1 | 601 | .....G                            | 720 |
| QLA48134.1 | 601 | .....XXXXXXXXXXXX                 | 720 |
| QKE11591.1 | 601 | .....G                            | 720 |
| QKE11799.1 | 601 | .....G                            | 720 |
| QKG90758.1 | 601 | .....G                            | 720 |
| QKR84613.1 | 601 | .....G                            | 720 |
| QKV40763.1 | 601 | .....G                            | 720 |
| QJR92997.1 | 601 | .....G                            | 720 |
| QJR93729.1 | 601 | .....G                            | 720 |
| QKV38580.1 | 601 | .....                             | 720 |
| QJR93825.1 | 593 | .....G                            | 712 |
| QKR85561.1 | 601 | .....G                            | 720 |
| QIS30355.1 | 601 | .....                             | 720 |
| QKV37764.1 | 601 | .....G                            | 720 |
| QJE39062.1 | 601 | .....                             | 720 |
| QKV07387.1 | 601 | .....                             | 720 |
| QJR93165.1 | 601 | .....G                            | 720 |
| QJR92229.1 | 601 | .....                             | 720 |
| QKG88454.1 | 601 | .....G                            | 720 |
| QJR91101.1 | 601 | .....G                            | 720 |
| QJR91473.1 | 601 | .....G                            | 720 |
| QJR88785.1 | 601 | .....G                            | 720 |
| QJA17048.1 | 601 | .....G                            | 720 |
| QJR86565.1 | 601 | .....                             | 720 |
| QJR89289.1 | 601 | .....G                            | 720 |
| QJR89301.1 | 601 | .....G                            | 720 |
| QJY40085.1 | 601 | .....G                            | 720 |
| QIC46373.1 | 601 | .....G                            | 720 |
| QKE11955.1 | 601 | .....G                            | 720 |
| QJQ83440.1 | 601 | .....G                            | 720 |
| QJE39145.1 | 601 | .....                             | 720 |
| QJR91401.1 | 601 | .....G                            | 720 |
| QJR90705.1 | 601 | .....G                            | 720 |
| QKR85333.1 | 601 | .....G                            | 720 |
| QKR84577.1 | 601 | .....G                            | 720 |
| QKU31169.1 | 601 | .....                             | 720 |
| QKV38689.1 | 601 | .....                             | 720 |
| QJR91209.1 | 601 | .....                             | 720 |
| QIC46217.1 | 601 | .....G                            | 720 |
| QIC46901.1 | 601 | .....G                            | 720 |
| QJA48015.1 | 601 | .....G                            | 720 |
| QJR93813.1 | 601 | .....                             | 720 |
| QJA16940.1 | 601 | .....G                            | 720 |
| QJR93585.1 | 601 | .....                             | 720 |
| QKV42562.1 | 601 | .....X                            | 720 |
| QJR91653.1 | 601 | .....                             | 720 |
| QJR90669.1 | 601 | .....G                            | 720 |
| QJR94077.1 | 601 | .....G                            | 720 |
| QJR89541.1 | 601 | .....                             | 720 |
| QJR93405.1 | 601 | .....G                            | 720 |
| QKR84853.1 | 601 | .....G                            | 720 |
| QJI53991.1 | 601 | .....G                            | 720 |
| QJR93885.1 | 601 | .....                             | 720 |
| QJR91593.1 | 601 | .....                             | 720 |
| QJR89829.1 | 601 | .....                             | 720 |
| QIQ08820.1 | 601 | .....G                            | 720 |
| QJR91761.1 | 601 | .....                             | 720 |
| QJS57279.1 | 601 | .....G                            | 720 |
| QJR95085.1 | 601 | .....                             | 720 |
